# Supplementary material for: Athletes’ Readiness for Alternative Protein Sources and Green Eating Practices: Towards a More Sustainable Diet in Sports Nutrition
Source: Research Square preprint supplement (doi:10.21203/rs.3.rs-7534127/v1), 2025-10-16
Supplement: Supplementary file 1 [file b6b45fa42978e9a82117f83d.docx]

**Appendices**

**Table A1.** Sociodemographic characteristics of the sample who responded ‘I don’t know’ (DK) versus the sample who responded in the ordered scale (R) (very unacceptable (=1) to very acceptable (=5)) to eat foods containing a sustainable protein source.

|  | Plant-based protein | | | | | Insect-based protein | | | | | Single-cell protein | | | | | | In vitro meat-based protein | | | | | |
| --- | --- | --- | --- | --- | --- | --- | --- | --- | --- | --- | --- | --- | --- | --- | --- | --- | --- | --- | --- | --- | --- | --- |
|  | DK | | Rest | | p | DK | | Rest | | p | DK | | Rest | | | p | DK | | Rest | | | p |
| n= | 6 | | 217 | |  | 25 | | 198 | |  | 26 | | 197 | | |  | 40 | | 183 | | |  |
| Age (years) mean ± SD | 18.3 | 4.2 | 20.0 | 4.7 | 0.604 | 21.1 | 4.7 | 19.8 | 4.6 | 0.150 | 20.2 | 4.6 | | 19.9 | 4.7 | 0.602 | 21.0 | 5.4 | 19.7 | 4.4 | 0.165 | | |
| Duration of sport (month) mean +-SD | 83.0 | 57.6 | 87.3 | 55.5 | 0.819 | 98.2 | 55.9 | 85.8 | 55.4 | 0.331 | 103.2 | 61.5 | | 85.1 | 54.4 | 0.180 | 93.6 | 59.1 | 85.8 | 54.7 | 0.431 | | |
| Anthropometrics mean ± SD |  |  |  |  |  |  |  |  |  |  |  |  | |  |  |  |  |  |  |  |  | | |
| Weight | 62.5 | 15.3 | 68.1 | 14.6 | 0.494 | 69.4 | 14.6 | 67.7 | 14.6 | 0.564 | 66.6 | 14.8 | | 68.1 | 14.6 | 0.687 | 68.5 | 15.3 | 173.6 | 10.7 | 0.748 | | |
| Heaight | 171.5 | 10.1 | 174.3 | 10.8 | 0.656 | 177.9 | 10.7 | 173.8 | 10.8 | 0.106 | 179.0 | 11.9 | | 173.6 | 10.5 | **0.018*** | 177.3 | 10.8 | 67.8 | 14.5 | **0.051*** | | |
| BMI | 21.1 | 4.3 | 22.2 | 3.3 | 0.346 | 21.9 | 3.7 | 22.2 | 3.3 | 0.629 | 20.7 | 3.5 | | 22.4 | 3.2 | **0.028*** | 21.7 | 3.8 | 22.3 | 3.2 | 0.306 | | |
| Green Eating Score mean ± SD |  |  |  |  |  |  |  |  |  |  |  |  | |  |  |  |  |  |  |  |  | | |
| SOC | 1.7 | 2.6 | 2.2 | 1.8 | 0.339 | 1.6 | 2.1 | 2.2 | 1.8 | 0.059 | 1.9 | 2.2 | | 2.2 | 1.8 | 0.301 | 2.1 | 2.2 | 2.2 | 1.8 | 0.559 | | |
| BEH | 2.7 | 1.8 | 2.9 | 1.0 | 0.742 | 2.9 | 1.2 | 2.9 | 1.1 | 0.666 | 3.0 | 1.1 | | 2.8 | 1.1 | 0.361 | 2.8 | 1.2 | 2.9 | 1.0 | 0.675 | | |
| DB Pros | 2.5 | 1.4 | 3.0 | 1.0 | 0.387 | 2.9 | 1.0 | 3.0 | 1.0 | 0.652 | 2.9 | 1.1 | | 3.0 | 1.0 | 0.814 | 2.9 | 1.1 | 3.0 | 1.0 | 0.563 | | |
| DB Cons | 1.7 | 0.8 | 2.6 | 0.9 | **0.011** | 2.5 | 0.9 | 2.6 | 0.9 | 0.450 | 2.5 | 0.9 | | 2.6 | 0.9 | 0.795 | 2.5 | 0.9 | 2.6 | 0.9 | 0.292 | | |
| SE at School | 3.2 | 1.7 | 2.4 | 1.0 | 0.070 | 2.4 | 1.1 | 2.4 | 1.1 | 0.949 | 2.3 | 1.2 | | 2.4 | 1.1 | 0.761 | 2.5 | 1.2 | 2.4 | 1.0 | 0.627 | | |
| SE at Home | 3.3 | 1.9 | 3.2 | 1.1 | 0.566 | 3.1 | 1.2 | 3.2 | 1.2 | 0.484 | 3.3 | 1.3 | | 3.2 | 1.1 | 0.717 | 3.3 | 1.2 | 3.2 | 1.1 | 0.858 | | |
| Gender | n | % | n | % |  | n | % | n | % |  | n | % | | n | % |  | n | % | n | % |  | | |
| Male | 4 | 67 | 127 | 59 | 1.000 | 16 | 64 | 115 | 58 | 0.669 | 16 | 62 | | 115 | 58 | 0.758 | 26 | 65 | 105 | 57 | 0.479 | | |
| Female | 2 | 33 | 90 | 41 | 9 | 36 | 83 | 42 | 10 | 38 | | 82 | 42 | 14 | 35 | 78 | 43 |
| Sport category |  |  |  |  |  |  |  |  |  |  |  |  | |  |  |  |  |  |  |  |  | | |
| Team | 4 | 67 | 142 | 65 | 0.496 | 18 | 72 | 128 | 65 | 0.772 | 19 | 73 | | 127 | 64 | 0.340 | 28 | 70 | 118 | 64 | 0.432 | | |
| Combat sport | 0 | 0 | 21 | 10 | 2 | 8 | 19 | 10 | 2 | 8 | | 19 | 10 | 4 | 10 | 17 | 9 |
| Water Sport | 0 | 0 | 21 | 10 | 1 | 4 | 20 | 10 | 0 | 0 | | 21 | 11 | 1 | 3 | 20 | 11 |
| Other | 2 | 33 | 33 | 15 | 4 | 16 | 31 | 16 | 5 | 19 | | 30 | 15 | 7 | 18 | 28 | 15 |
| Supplemantation |  |  |  |  |  |  |  |  |  |  |  |  | |  |  |  |  |  |  |  |  | | |
| No | 3 | 50 | 159 | 73 | 0.349 | 15 | 60 | 147 | 74 | 0.154 | 15 | 58 | | 147 | 75 | 0.990 | 23 | 58 | 139 | 76 | **0.030*** | | |
| Yes | 3 | 50 | 58 | 27 | 10 | 40 | 51 | 26 | 11 | 42 | | 50 | 25 | 17 | 43 | 44 | 24 |
| Nutrition Education |  |  |  |  |  |  |  |  |  |  |  |  | |  |  |  |  |  |  |  |  | | |
| No | 5 | 83 | 150 | 69 | 0.670 | 15 | 60 | 140 | 71 | 0.356 | 16 | 62 | | 139 | 71 | 0.369 | 25 | 63 | 130 | 71 | 0.343 | | |
| Yes | 1 | 17 | 67 | 31 | 10 | 40 | 58 | 29 | 10 | 38 | | 58 | 29 | 15 | 38 | 53 | 29 |
| Sustainable Nutrition Education |  |  |  |  |  |  |  |  |  |  |  |  | |  |  |  |  |  |  |  |  | | |
| No | 6 | 100 | 180 | 83 | 0.593 | 19 | 76 | 167 | 84 | 0.268 | 20 | 77 | | 166 | 84 | 0.398 | 29 | 73 | 157 | 86 | 0.058 | | |
| Yes | 0 | 0 | 37 | 17 | 6 | 24 | 31 | 16 | 6 | 23 | | 31 | 16 | 11 | 28 | 26 | 14 |
| Dietary regime |  |  |  |  |  |  |  |  |  |  |  |  | |  |  |  |  |  |  |  |  | | |
| Omnivor | 6 | 100 | 205 | 94 | 1.000 | 23 | 92 | 188 | 95 | 0.630 | 25 | 96 | | 186 | 94 | 1.000 | 35 | 88 | 176 | 96 | **0.044*** | | |
| Meat limiting diet | 0 | 0 | 12 | 6 | 2 | 8 | 10 | 5 | 1 | 4 | | 11 | 6 | 5 | 13 | 7 | 4 |
| Particular diet for sport |  |  |  |  |  |  |  |  |  |  |  |  | |  |  |  |  |  |  |  |  | | |
| No | 3 | 50 | 163 | 75 | 0.176 | 16 | 64 | 150 | 76 | 0.226 | 16 | 62 | | 150 | 76 | 0.149 | 24 | 60 | 142 | 78 | **0.021*** | | |
| Yes | 3 | 50 | 54 | 25 | 9 | 36 | 48 | 24 | 10 | 38 | | 47 | 24 | 16 | 40 | 41 | 22 |

* p < 0.05 obtained from chi-square test or Fisher’s exact test for categorical variables or a Mann-Whitney U test for continuous variables. Descriptive statistics are expressed as frequency, percentage, or mean ± standard deviation. Presented as percent of total unless otherwise indicated.

**Table A2.** Correlation matrix of determinants in ordinal regression analyses for acceptance to consume sustainable protein sources.

|  | Gender | Age (years) | Sport category | Duration of sport (month) | Dietary Supplementation | Nutrition Education | Sustainable Nutrition Education | Dietary regime | Particular diet for sport | SOC | BEH | DB Pros | DB Cons | SE at School | SE at Home |
| --- | --- | --- | --- | --- | --- | --- | --- | --- | --- | --- | --- | --- | --- | --- | --- |
| Gender | 1 |  |  |  |  |  |  |  |  |  |  |  |  |  |  |
| Age (years) | ,146* | 1 |  |  |  |  |  |  |  |  |  |  |  |  |  |
| Sport category | ,212** | ,228** | 1 |  |  |  |  |  |  |  |  |  |  |  |  |
| Duration of sport (month) | -0.024 | ,511** | -0.083 | 1 |  |  |  |  |  |  |  |  |  |  |  |
| Dietary Supplementation | 0.037 | ,233** | 0.088 | 0.087 | 1 |  |  |  |  |  |  |  |  |  |  |
| Nutrition Education | ,157* | ,277** | ,151* | ,186** | ,249** | 1 |  |  |  |  |  |  |  |  |  |
| Sustainable Nutrition Education | 0.067 | ,247** | 0.127 | ,139* | ,240** | ,647** | 1 |  |  |  |  |  |  |  |  |
| Dietary regime | 0.042 | 0.029 | 0.051 | -0.024 | 0.032 | -0.028 | -0.053 | 1 |  |  |  |  |  |  |  |
| Particular diet for sport | 0.052 | ,238** | ,135* | ,206** | ,263** | ,371** | ,319** | 0.042 | 1 |  |  |  |  |  |  |
| SOC | 0.121 | 0.043 | 0.042 | 0.037 | ,147* | ,143* | 0.108 | -0.061 | ,198** | 1 |  |  |  |  |  |
| BEH | ,140* | 0.039 | 0.017 | -0.111 | 0.078 | -0.044 | 0.102 | -,175** | 0.035 | 0.125 | 1 |  |  |  |  |
| DB Pros | ,212** | 0.017 | 0.000 | -0.031 | 0.042 | -0.022 | 0.070 | -0.065 | -0.019 | ,215** | ,334** | 1 |  |  |  |
| DB Cons | 0.126 | ,145* | -0.057 | 0.108 | 0.020 | 0.042 | 0.098 | -0.127 | 0.058 | 0.024 | ,225** | ,564** | 1 |  |  |
| SE at School | 0.067 | -0.012 | -0.013 | 0.030 | -0.056 | -0.009 | 0.037 | -0.076 | ,132* | ,175** | ,185** | ,258** | 0.093 | 1 |  |
| SE at Home | 0.066 | 0.055 | 0.011 | 0.073 | -0.023 | -0.010 | -0.013 | -,149* | 0.100 | ,229** | ,243** | ,383** | ,212** | ,608** | 1 |

Abbreviations: SOC, Stages of Change; BEH, Behavior; DB, Decisional Balance; Pros, advantages; Cons, disadvantages; SE, Self-efficacy. * p-value < 0.05, ** p-value < 0.01. statistically significant.

**Table A3.** Level of acceptance to eat dietary protein sources in athletes (N=223).

|  | I don't know | | Very unacceptable | | Unacceptable | | Neutral | | Acceptable | | Very acceptable | |
| --- | --- | --- | --- | --- | --- | --- | --- | --- | --- | --- | --- | --- |
|  | **n** | **%** | **n** | **%** | **n** | **%** | **n** | **%** | **n** | **%** | **n** | **%** |
| Plant | 6 | 2.7 | 1 | 0.4 | 3 | 1.3 | 31 | 13.9 | 92 | 41.3 | 90 | 40.4 |
| Animal | 4 | 1.8 | 4 | 1.8 | 3 | 1.3 | 24 | 10.8 | 59 | 26.5 | 129 | 57.8 |
| Dairy | 4 | 1.8 | 5 | 2.2 | 5 | 2.2 | 23 | 10.3 | 59 | 26.5 | 127 | 57.0 |
| Seafood | 5 | 2.2 | 6 | 2.7 | 6 | 2.7 | 32 | 14.3 | 62 | 27.8 | 112 | 50.2 |
| Insect | 25 | 11.2 | 82 | 36.8 | 34 | 15.2 | 34 | 15.2 | 26 | 11.7 | 22 | 9.9 |
| Single-cell | 26 | 11.7 | 51 | 22.9 | 35 | 15.7 | 52 | 23.3 | 37 | 16.6 | 22 | 9.9 |
| In vitro | 40 | 17.9 | 73 | 32.7 | 31 | 13.9 | 29 | 13.0 | 30 | 13.5 | 20 | 9.0 |
